# Supplementary material
Source: PubMed Central journal article supplement (PMC2718318)
Supplement: mmc1.pdf [file mmc1.pdf]

Biophysical Journal, Volume 96

**Supporting Material**

**All-Atom Contact Model for Understanding Protein Dynamics from  
Crystallographic B-factors**

Da-Wei Li and Rafael Brüschweiler

*Supporting Information*

**All-Atom Contact Model for Understanding Protein Dynamics  
from Crystallographic B-factors**

Da-Wei Li and Rafael Brüschweiler

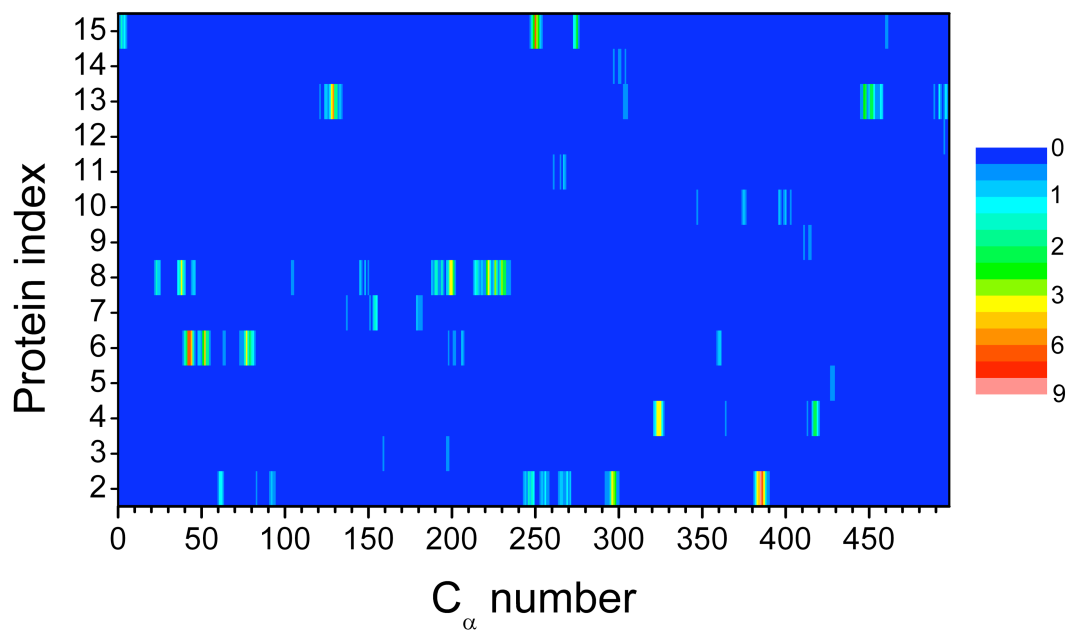

**Fig. S1.** Contributions to the  $C_{\alpha}$  contact sum by the 14 closest protein neighbors. Note that the color scale is not linear and has two segments. Some  $C_{\alpha}$  atoms have contributions from more than 1 neighboring protein. The surrounding proteins are numbered from 2 - 15.

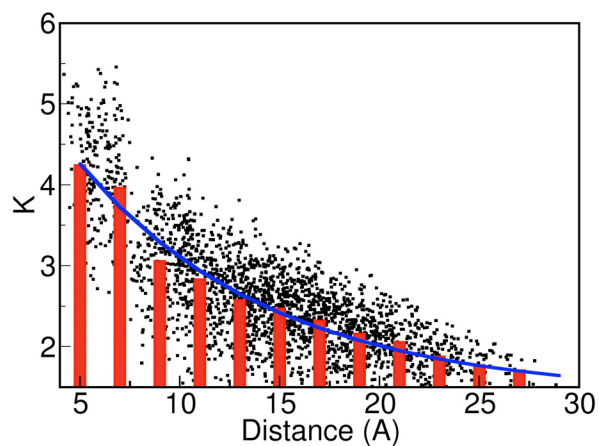

**Fig. S2.** Force constant  $K$  ( $f_{ij}$ ) as a function of distance  $r_{ij}$  between all pairs of  $C\alpha$  atoms of the GNM model applied to Ubiquitin. The black dots are generated from a canonical ensemble using the GNM energy function directly. The red bars are averages over 2 Å distance intervals. The blue is a least-squares fit by the exponential function of Eq. 13.

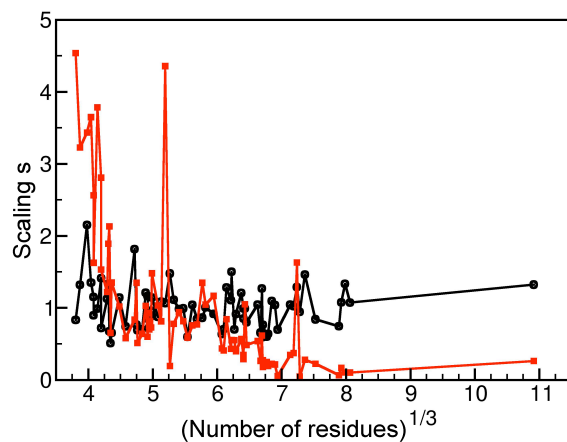

**Fig. S3.** The overall scaling factor of B-factors as a function of protein size (determined by  $(\text{number of residues})^{-1/3}$ ) for eLCMB (black) and ROM (red).
